# Supplementary material
Source: PubMed Central journal article supplement (PMC9874399)
Supplement: IJPO-18-0-s001.pdf [file IJPO-18-0-s001.pdf]

1 **Short-term complications and post-acute sequelae in hospitalized pediatric patients with COVID-**  
2 **19 and obesity: a multicenter cohort study**

3 Gonzalo Valenzuela<sup>1,2</sup>, Gonzalo Alarcón-Andrade<sup>1</sup>; Clara Schulze-Schiapacasse<sup>1</sup>; Rocío Rodríguez<sup>3</sup>;  
4 Tamara García-Salum<sup>1,2</sup>; Catalina Pardo-Roa<sup>1,2</sup>; Jorge Levican<sup>1</sup>; Eileen Serrano<sup>1</sup>, María José Avendaño<sup>1</sup>;  
5 Monserrat Gutiérrez<sup>4,5</sup>, Loreto Godoy<sup>4,5</sup>; Pamela Céspedes<sup>5</sup>; Sandra Bermudez<sup>5</sup>; Javiera Aravena<sup>4,6</sup>; Irini  
6 Nicolaides<sup>4,6</sup>; Eliana Martínez<sup>4</sup>; Constanza Gómez-Canobbio<sup>4</sup>; Macarena Jofré<sup>4</sup>; Andrea Salinas<sup>4</sup>; Daniela  
7 Depaoli<sup>6</sup>; Carolina Loza<sup>4,6</sup>; Andrés Muñoz<sup>4,6</sup>; Natalia Ormazábal<sup>6</sup>; Diana Manzur<sup>3</sup>; José Barriga<sup>3</sup>;  
8 Leonardo I. Almonacid<sup>1</sup>; Estefany Poblete-Cárdenas<sup>1</sup>; Erick Salinas<sup>1,2</sup>; Andrés Muñoz-Marcos<sup>1</sup>; Salesa  
9 Barja<sup>4,7,8</sup> and Rafael A. Medina<sup>1,2,9</sup>.

10 **Affiliations:**

11 1 Department of Pediatric Infectious Diseases and Immunology, School of Medicine, Pontificia  
12 Universidad Católica de Chile, Santiago, Chile.

13 2 Advanced Interdisciplinary Rehabilitation Register (AIRR) – COVID-19 Working Group, Faculty of  
14 Medicine, Pontificia Universidad Católica de Chile, Santiago, Chile.

15 3 Hospital Clínico Red Salud UC-Christus, Santiago, Chile.

16 4 Department of Pediatrics, School of Medicine, Pontificia Universidad Católica de Chile, Santiago, Chile.

17 5 Hospital Dr. Sótero del Río, Santiago, Chile.

18 6 Hospital Clínico La Florida, Santiago, Chile.

19 7 Department of Pediatric Gastroenterology and Nutrition. School of Medicine. Pontificia Universidad  
20 Católica de Chile. Santiago, Chile.

21 8 Hospital Josefina Martínez, Santiago, Chile.

22 9 Department of Microbiology, Icahn School of Medicine at Mount Sinai, New York, NY, USA.

23

24 **Keywords:** COVID-19; obesity; child; adolescent; intensive care units; post-acute COVID-19 syndrome

25

26 **Running title:** COVID-19 complications in children with obesity

27 **Address correspondence to:** Rafael A. Medina, Department of Pediatric Infectious Diseases and  
28 Immunology, Marcoleta, Santiago, Chile, 391. E-mail: rmedinai@uc.cl.

STROBE Statement—Checklist of items that should be included in reports of *cohort studies*

|                              | <b>Item No</b> | <b>Recommendation</b>                                                                                                                                                                             | <b>Page No</b> |
|------------------------------|----------------|---------------------------------------------------------------------------------------------------------------------------------------------------------------------------------------------------|----------------|
| <b>Title and abstract</b>    | 1              | (a) Indicate the study's design with a commonly used term in the title or the abstract                                                                                                            | 1              |
|                              |                | (b) Provide in the abstract an informative and balanced summary of what was done and what was found                                                                                               | 3              |
| <b>Introduction</b>          |                |                                                                                                                                                                                                   |                |
| Background/rationale         | 2              | Explain the scientific background and rationale for the investigation being reported                                                                                                              | 4-5            |
| Objectives                   | 3              | State specific objectives, including any prespecified hypotheses                                                                                                                                  | 5              |
| <b>Methods</b>               |                |                                                                                                                                                                                                   |                |
| Study design                 | 4              | Present key elements of study design early in the paper                                                                                                                                           | 5-8            |
| Setting                      | 5              | Describe the setting, locations, and relevant dates, including periods of recruitment, exposure, follow-up, and data collection                                                                   | 5              |
| Participants                 | 6              | (a) Give the eligibility criteria, and the sources and methods of selection of participants. Describe methods of follow-up                                                                        | 5,7            |
|                              |                | (b) For matched studies, give matching criteria and number of exposed and unexposed                                                                                                               | NA             |
| Variables                    | 7              | Clearly define all outcomes, exposures, predictors, potential confounders, and effect modifiers. Give diagnostic criteria, if applicable                                                          | 6-7            |
| Data sources/<br>measurement | 8*             | For each variable of interest, give sources of data and details of methods of assessment (measurement). Describe comparability of assessment methods if there is more than one group              | 7-8            |
| Bias                         | 9              | Describe any efforts to address potential sources of bias                                                                                                                                         | 7-8            |
| Study size                   | 10             | Explain how the study size was arrived at                                                                                                                                                         | 5              |
| Quantitative variables       | 11             | Explain how quantitative variables were handled in the analyses. If applicable, describe which groupings were chosen and why                                                                      | 7-8            |
| Statistical methods          | 12             | (a) Describe all statistical methods, including those used to control for confounding                                                                                                             | 7-8            |
|                              |                | (b) Describe any methods used to examine subgroups and interactions                                                                                                                               | 7-8            |
|                              |                | (c) Explain how missing data were addressed                                                                                                                                                       | 8              |
|                              |                | (d) If applicable, explain how loss to follow-up was addressed                                                                                                                                    | 8              |
|                              |                | (e) Describe any sensitivity analyses                                                                                                                                                             | 7              |
| <b>Results</b>               |                |                                                                                                                                                                                                   |                |
| Participants                 | 13*            | (a) Report numbers of individuals at each stage of study—eg numbers potentially eligible, examined for eligibility, confirmed eligible, included in the study, completing follow-up, and analysed | 8-9            |
|                              |                | (b) Give reasons for non-participation at each stage                                                                                                                                              | 9              |
|                              |                | (c) Consider use of a flow diagram                                                                                                                                                                | 8              |
| Descriptive data             | 14*            | (a) Give characteristics of study participants (eg demographic, clinical, social) and information on exposures and potential confounders                                                          | 8              |
|                              |                | (b) Indicate number of participants with missing data for each variable of interest                                                                                                               | 9              |
|                              |                | (c) Summarise follow-up time (eg, average and total amount)                                                                                                                                       | 7              |
| Outcome data                 | 15*            | Report numbers of outcome events or summary measures over time                                                                                                                                    | 8-11           |

|                          |        |                                                                                                                                                                                                                                                                                                                                                                                                                       |                                 |
|--------------------------|--------|-----------------------------------------------------------------------------------------------------------------------------------------------------------------------------------------------------------------------------------------------------------------------------------------------------------------------------------------------------------------------------------------------------------------------|---------------------------------|
| Main results             | 1<br>6 | (a) Give unadjusted estimates and, if applicable, confounder-adjusted estimates and their precision (eg, 95% confidence interval). Make clear which confounders were adjusted for and why they were included<br><br>(b) Report category boundaries when continuous variables were categorized<br><br>(c) If relevant, consider translating estimates of relative risk into absolute risk for a meaningful time period | 8-11<br><br>8, 16, 18<br><br>NA |
| Other analyses           | 1<br>7 | Report other analyses done—eg analyses of subgroups and interactions, and sensitivity analyses                                                                                                                                                                                                                                                                                                                        | -                               |
| <b>Discussion</b>        |        |                                                                                                                                                                                                                                                                                                                                                                                                                       |                                 |
| Key results              | 1<br>8 | Summarise key results with reference to study objectives                                                                                                                                                                                                                                                                                                                                                              | 12-14                           |
| Limitations              | 1<br>9 | Discuss limitations of the study, taking into account sources of potential bias or imprecision. Discuss both direction and magnitude of any potential bias                                                                                                                                                                                                                                                            | 14-15                           |
| Interpretation           | 2<br>0 | Give a cautious overall interpretation of results considering objectives, limitations, multiplicity of analyses, results from similar studies, and other relevant evidence                                                                                                                                                                                                                                            | 12-14                           |
| Generalisability         | 2<br>1 | Discuss the generalisability (external validity) of the study results                                                                                                                                                                                                                                                                                                                                                 | 14                              |
| <b>Other information</b> |        |                                                                                                                                                                                                                                                                                                                                                                                                                       |                                 |
| Funding                  | 2<br>2 | Give the source of funding and the role of the funders for the present study and, if applicable, for the original study on which the present article is based                                                                                                                                                                                                                                                         | 21                              |

\*Give information separately for exposed and unexposed groups.

**Note:** An Explanation and Elaboration article discusses each checklist item and gives methodological background and published examples of transparent reporting. The STROBE checklist is best used in conjunction with this article (freely available on the Web sites of PLoS Medicine at <http://www.plosmedicine.org/>, Annals of Internal Medicine at <http://www.annals.org/>, and Epidemiology at <http://www.epidem.com/>). Information on the STROBE Initiative is available at <http://www.strobe-statement.org>.

**Supplemental file 2.** Vital signs and laboratory findings at admission of inpatients infected with SARS-CoV-2 according to the presence of obesity.

| <b>Variables</b>                         | All patients<br>(n=216) <sup>†</sup> | Patients<br>with obesity<br>(n=67) <sup>†</sup> | Patients<br>without<br>obesity<br>(n=149) <sup>†</sup> | P value          |
|------------------------------------------|--------------------------------------|-------------------------------------------------|--------------------------------------------------------|------------------|
| <b>Vital signs*:</b>                     |                                      |                                                 |                                                        |                  |
| Temperature (°C), median (IQR)           | 37.3 (36.4-38.3)                     | 37.0 (36.4-38.3)                                | 37.5 (36.5-38.3)                                       | 0.486            |
| Temperature ≥38°C, n (%)                 | 76 (35.19)                           | 24 (35.82)                                      | 52 (34.90)                                             | 0.896            |
| Tachycardia, n (%)                       | 106 (49.07)                          | 49 (73.13)                                      | 57 (38.26)                                             | <b>&lt;0.001</b> |
| Tachypnea, n (%)                         | 116 (53.70)                          | 52 (77.61)                                      | 64 (42.95)                                             | <b>&lt;0.001</b> |
| SpO2, n (%)                              | 96 (93-98)                           | 95 (90-98)                                      | 97 (94-98)                                             | 0.053            |
| <b>Laboratory parameter</b>              |                                      |                                                 |                                                        |                  |
| Complete blood count** (n=214)           |                                      |                                                 |                                                        |                  |
| Anemia, n (%)                            | 41 (19.16)                           | 8 (12.2)                                        | 33 (22.30)                                             | 0.081            |
| Leucopenia, n (%)                        | 52 (24.30)                           | 15 (22.73)                                      | 37 (25.00)                                             | 0.720            |
| Leukocytosis, n (%)                      | 39 (18.22)                           | 10 (15.15)                                      | 29 (19.59)                                             | 0.437            |
| Neutropenia, n (%)                       | 22 (10.28)                           | 4 (6.06)                                        | 18 (12.16)                                             | 0.175            |
| Neutrophilia, n (%)                      | 49 (22.90)                           | 15 (22.73)                                      | 34 (22.97)                                             | 0.968            |
| Lymphopenia, n (%)                       | 97 (45.33)                           | 36 (54.55)                                      | 61 (41.22)                                             | 0.070            |
| Lymphocytosis, n (%)                     | 7 (3.27)                             | 0 (0)                                           | 7 (4.73)                                               | NA               |
| Thrombocytopenia, n (%)                  | 31 (14.49)                           | 11 (16.67)                                      | 20 (13.51)                                             | 0.545            |
| Thrombocytosis, n (%)                    | 45 (21.03)                           | 8 (12.12)                                       | 37 (25.00)                                             | <b>0.033</b>     |
| C-Reactive Protein ** (n=206)            |                                      |                                                 |                                                        |                  |
| C-Reactive Protein (mg/dL), median (IQR) | 1.38 (0.24-8.39)                     | 3.02 (1.00-12.58)                               | 0.71 (0.15-6.07)                                       | <b>&lt;0.001</b> |
| C-Reactive Protein ≥3 mg/dL, n (%)       | 82 (39.81)                           | 33 (50.00)                                      | 49 (35.00)                                             | <b>0.040</b>     |

Univariate analyses were performed accordingly with chi-square, Fisher's exact and Mann-Whitney-

Wilcoxon tests. Statistical significance was set at  $p$  value  $<0.05$ . IQR: Interquartile range; NA: Not Applicable. †214 patients had a complete blood count (66 with obesity and 148 without obesity), and 206 patients had C-reactive protein results (66 with obesity and 140 without obesity). \*Vital signs were interpreted according to age following the Pediatric Advanced Life Support (PALS) guidelines. \*\*Blood cell counts were interpreted following age reference intervals determined by Lubin et al 1994.

**Supplemental file 3. Adjusted odds ratios for short-term complications in pediatric patients with obesity and COVID-19.** Covariables used to adjust models for each outcome are detailed in each graph. Abbreviations: OR: Odds Ratio, ICU: Intensive Care Unit, NIMV: Noninvasive Mechanical Ventilation, HA COVID-19: Healthcare-Associated COVID-19.

### ICU

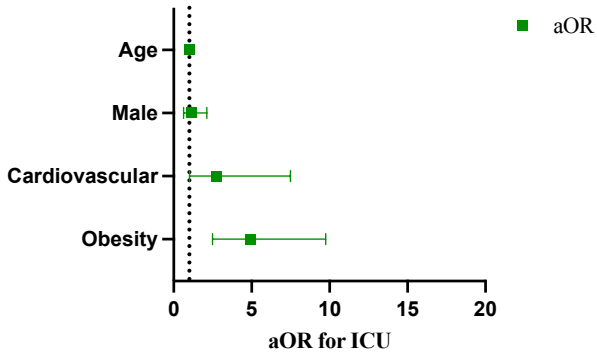

### Oxygen

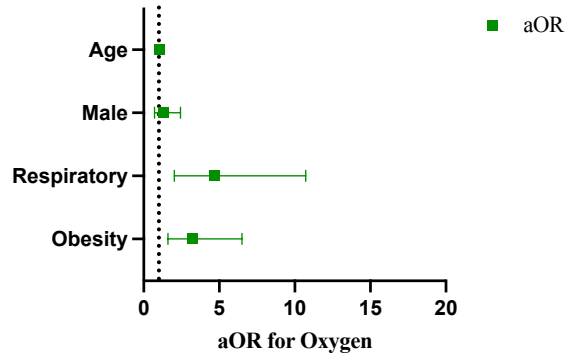

### NIVM

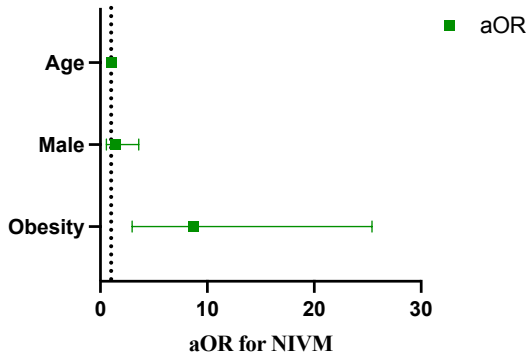

### Overall superinfections

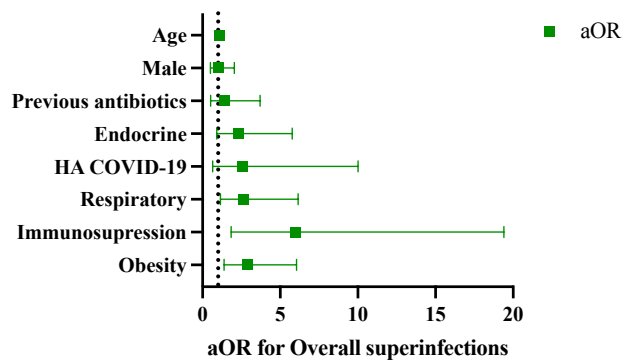

### Bacterial superinfection

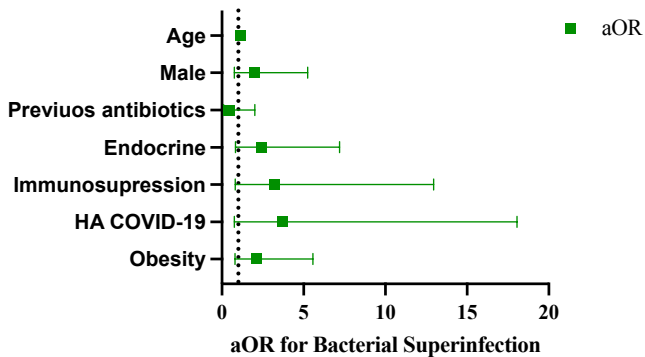

### Suspected bacterial pneumonia

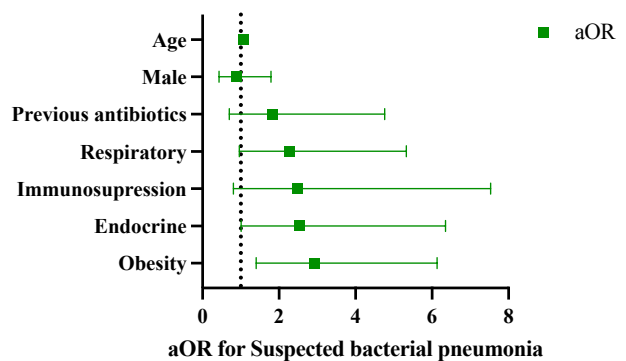

**Supplemental file 4. Adjusted odds ratios in cluster analysis for short-term complications in pediatric patients with obesity and COVID-19.** Cluster analysis is based on dependency given by the hospital at admission and the time period of the predominant lineage or variant of concern. Covariables use to adjust models for each outcome are detailed in each graph. Abbreviations: OR: Odds Ratio, ICU: Intensive Care Unit, NIMV: Non-Invasive Mechanical Ventilation, HA COVID-19: Healthcare-Associated COVID-19.



### ICU

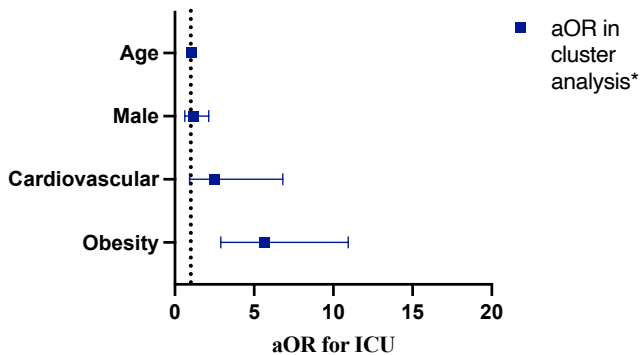

### Oxygen

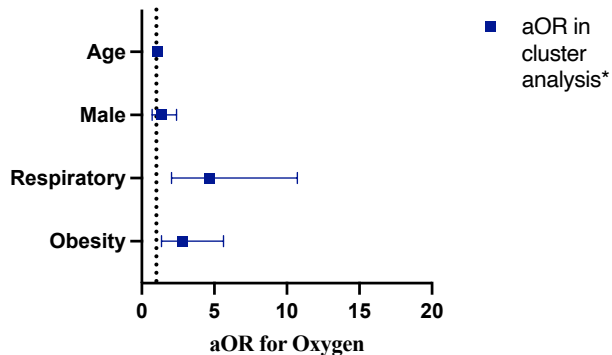

### NIMV

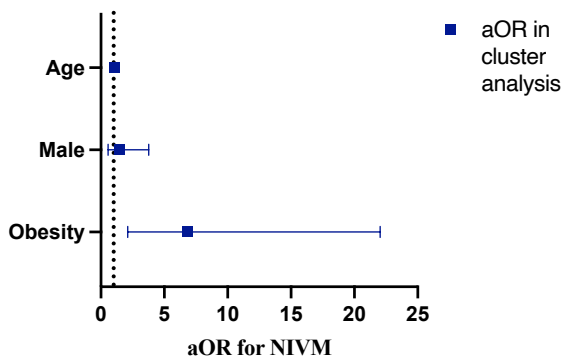

### Overall superinfections

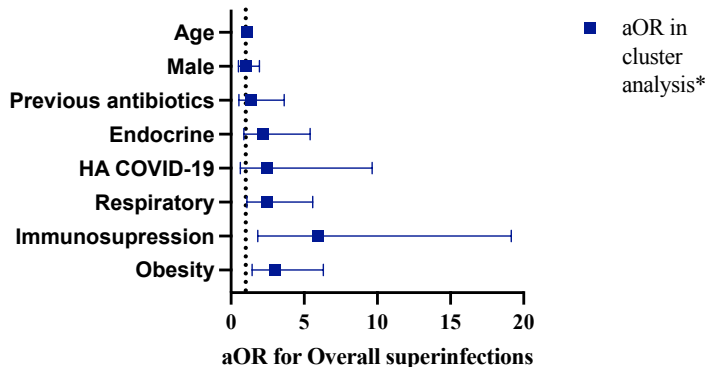

### Proven bacterial superinfection

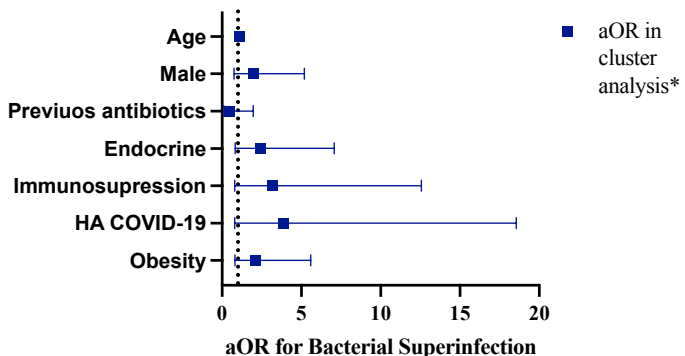

### Suspected bacterial pneumonia

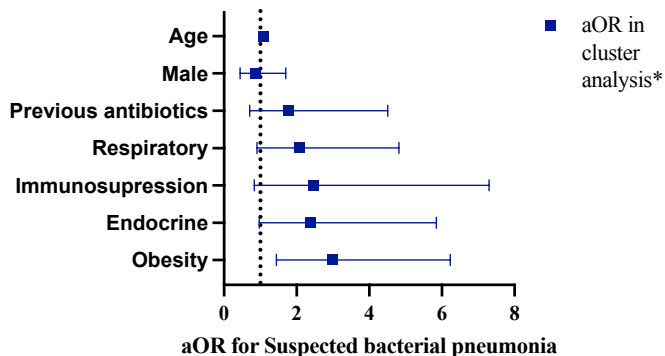

**Supplemental file 5.** Age-adjusted versus age-stratified analysis of the main outcomes.

| Variable                      | Age-adjusted<br>aOR<br>(CI95%)<br>n=216 | Age-stratified analysis                                  |                                                        |
|-------------------------------|-----------------------------------------|----------------------------------------------------------|--------------------------------------------------------|
|                               |                                         | aOR for patients<br>12 years and over<br>(CI95%)<br>n=88 | aOR for patients<br>under 12 years<br>(CI95%)<br>n=128 |
| ICU admission                 | 5.63 (2.90-10.94)*                      | 9.61 (4.21-21.94)*                                       | 3.60 (1.47-8.83)*                                      |
| Oxygen                        | 2.77 (1.36-5.63)*                       | 5.60 (2.05-15.34)*                                       | 2.24 (0.83-6.03)                                       |
| NIMV                          | 6.81 (2.11-22.04)*                      | 17.09 (1.78-163.82)*                                     | 2.51 (0.44-14.41)                                      |
| Overall superinfections       | 3.02 (1.45-6.31)*                       | 1.49 (0.56-3.93)                                         | 7.21 (2.30-22.63)*                                     |
| Suspected bacterial pneumonia | 3.00 (1.44-6.23)*                       | 2.09 (0.78-5.56)                                         | 6.69 (2.20-20.38)*                                     |
| Dyspnea                       | 9.91 (1.92-51.10)*                      | 6.38 (0.71-57.91)                                        | 16.52 (1.67-164.66)*                                   |
| Muscle weakness               | 20.04 (2.50-160.65)*                    | 10.34 (1.22-87.41)*                                      | NA#                                                    |

Analysis performed following generalized estimating equations methodology (cluster analysis).

\* Statistically significant ( $p < 0.05$ ).

# All patients under 12 years old with muscle weakness at follow-up had obesity.

ICU: intensive care unit; NIMV: non-invasive mechanical ventilation; aOR: adjusted odds ratio; CI95%: 95% confidence interval.
